# Supplementary material for: Assessment of Protein Content and Phosphorylation Level in Synechocystis sp. PCC 6803 under Various Growth Conditions Using Quantitative Phosphoproteomic Analysis
Source: MDPI journal article supplement (doi:10.3390/molecules25163582), 2020-08-06
Supplement: s1 [file s1]

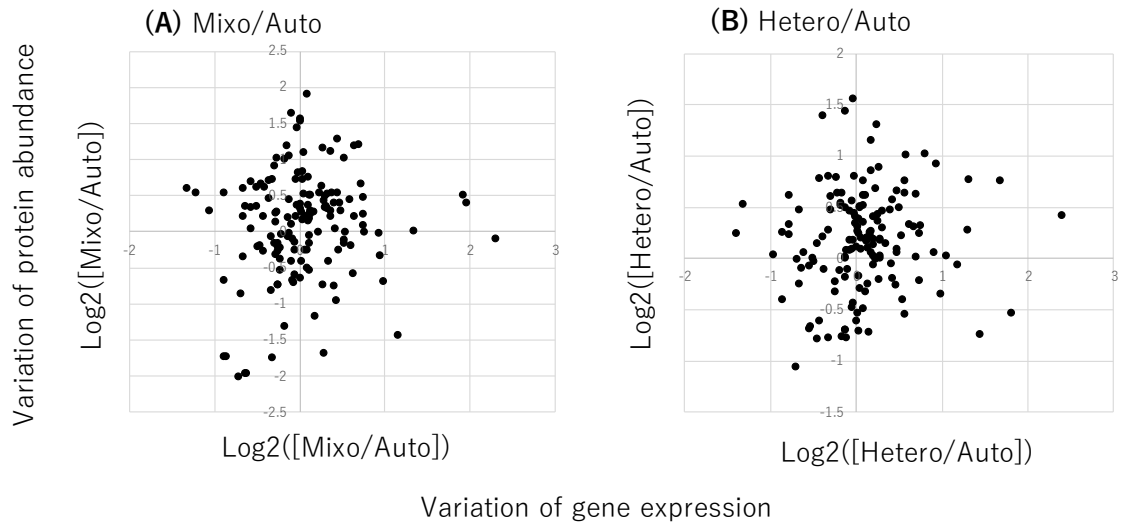

**Figure S1.** Comparison between variations in gene expression and protein abundance. Gene expression dataset was obtained from literature [18]. Protein abundance dataset was obtained from this study using the identical strain and the culture conditions.

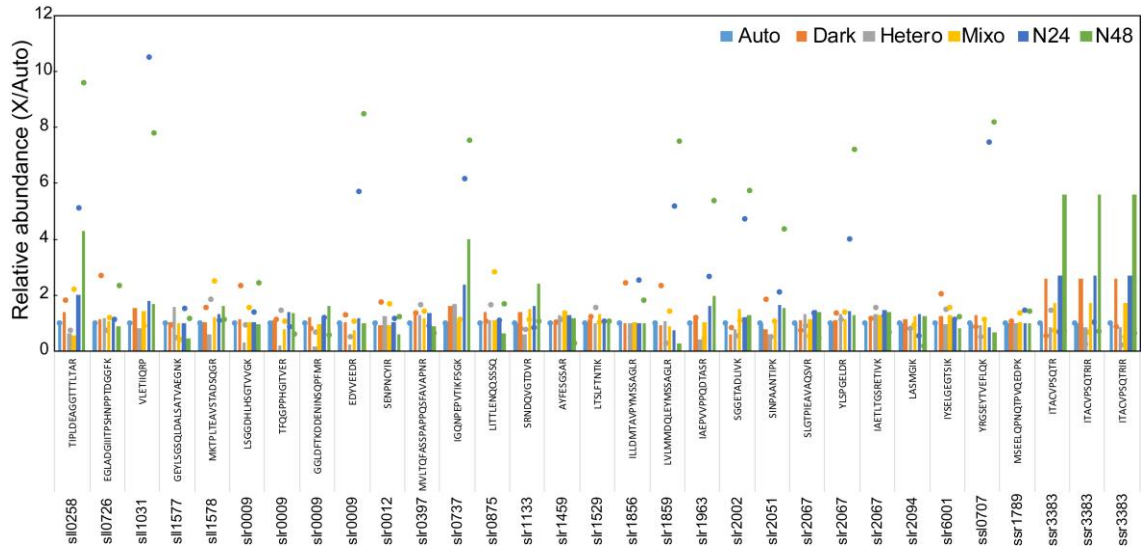

**Figure S2.** Relative abundance of protein and phosphoprotein. Bars show the protein abundance. Dots show the phosphopeptide abundance. Each value represents the mean of three independent experiments.
