# Supplementary material for: Assessment of Protein Content and Phosphorylation Level in Synechocystis sp. PCC 6803 under Various Growth Conditions Using Quantitative Phosphoproteomic Analysis
Source: Molecules. 2020 Aug 6;25(16):3582. doi: 10.3390/molecules25163582 (PMC7466104; doi:10.3390/molecules25163582)
Supplement: Supplementary file 1 [file molecules-25-03582-s001.zip › Supplementary_Materials_rev/Supplementary_Materials_Tables.xlsx]

## Sheet: Table S1
Table S1 MRM assay method for phosphoproteome data acquisition
Protein	Peptide	Q1	Q3-1	Q3-2	Q3-3	Q3-4	Q3-5	Q3-6	Q3-7	Q3-8	Q3-9	Q3-10	Q3-11	Q3-12	Q3-13
Sll0258 cytochrome c550	T[+79.966331]IPLDEAGGTTTLTAR_heavy	572.591	539.932	889.438	831.42	773.401	671.356	569.312	467.267
Sll0258 cytochrome c550	T[+79.966331]IPLDEAGGTTTLTAR_heavy	858.383	809.395	831.42	773.401	755.294	827.328	787.37	845.388	1045.41	947.433	1049.48
Sll0258 cytochrome c550	T[+79.966331]IPLDEAGGTTTLTAR_light	566.277	533.618	877.474	820.452	763.431	662.383	561.336	460.288
Sll0258 cytochrome c550	T[+79.966331]IPLDEAGGTTTLTAR_light	848.911	799.923	820.452	763.431	749.312	820.349	779.393	836.415	1035.44	937.462	1038.51
Sll0726 phosphoglucomutase	EGLADGIIITPS[+79.966331]HNPPTDGGFK_heavy	781.343	1251.53	1251.46	943.415	827.378	729.328
Sll0726 phosphoglucomutase	EGLADGIIITPS[+79.966331]HNPPTDGGFK_heavy	1171.51	1353.58	1251.53	1251.46	827.378
Sll0726 phosphoglucomutase	EGLADGIIITPS[+79.966331]HNPPTDGGFK_light	772.702	1235.58	1236.5	932.447	818.404	721.351
Sll0726 phosphoglucomutase	EGLADGIIITPS[+79.966331]HNPPTDGGFK_light	1158.55	1336.63	1235.58	1236.5	818.404
Sll1031 carbon dioxide concentrating mechanism protein CcmM, putative carboxysome structural protein	VLET[+79.966331]IIQRP_heavy	581.288	532.3	527.205	429.228	543.309	755.367	657.39
Sll1031 carbon dioxide concentrating mechanism protein CcmM, putative carboxysome structural protein	VLET[+79.966331]IIQRP_light	574.807	525.819	523.216	425.24	538.323	749.385	651.408
Sll1577 phycocyanin beta subunit	GEYLS[+79.966331]GSQLDALSATVAEGNK_heavy	1107.47	1058.48	887.409	799.38	727.346	625.302	525.236	453.202	323.162	265.144
Sll1577 phycocyanin beta subunit	GEYLS[+79.966331]GSQLDALSATVAEGNK_light	1095.5	1046.51	876.442	789.41	718.373	617.325	518.257	447.22	318.177	261.156
Sll1578 phycocyanin alpha subunit	M[+15.994915]KT[+79.966331]PLTEAVSTADSQGR_heavy	637.267	461.14	363.163	559.19	673.271	575.294	775.315	677.338	905.355	807.378	977.389	879.412
Sll1578 phycocyanin alpha subunit	M[+15.994915]KT[+79.966331]PLTEAVSTADSQGR_light	629.955	457.152	359.175	554.204	667.288	569.312	768.336	670.359	897.379	799.402	968.416	870.439
Slr0009 ribulose bisphosphate carboxylase large subunit	EDY[+79.966331]VEEDR_heavy	573.187	524.198	247.071	491.098	393.121	493.186	721.203	869.289
Slr0009 ribulose bisphosphate carboxylase large subunit	EDY[+79.966331]VEEDR_light	567.703	518.715	245.077	488.106	390.13	489.198	716.217	862.31
Slr0009 ribulose bisphosphate carboxylase large subunit	GGLDFTKDDENINS[+79.966331]QPFMR_heavy	763.969	731.31	971.345	855.308	757.331	687.312	557.26	344.16	279.134	230.109	156.076
Slr0009 ribulose bisphosphate carboxylase large subunit	GGLDFTKDDENINS[+79.966331]QPFMR_light	755.328	722.669	959.38	845.338	747.361	678.339	550.281	339.673	275.644	227.118	153.583
Slr0009 ribulose bisphosphate carboxylase large subunit	LS[+79.966331]GGDHLHSGTVVGK_heavy	782.337	733.349	1165.55	1049.53	509.301	307.191	301.144	515.145	655.195	769.276	811.349	899.378
Slr0009 ribulose bisphosphate carboxylase large subunit	LS[+79.966331]GGDHLHSGTVVGK_light	772.367	723.378	1149.6	1034.57	503.319	303.203	297.156	510.16	647.218	760.303	799.385	886.417
Slr0009 ribulose bisphosphate carboxylase large subunit	T[+79.966331]FQGPPHGIT[+79.966331]VER_heavy	809.314	760.325	711.337	1001.5	1001.42	665.346	607.327	591.223
Slr0009 ribulose bisphosphate carboxylase large subunit	T[+79.966331]FQGPPHGIT[+79.966331]VER_light	799.842	750.853	701.865	987.537	988.461	656.373	599.351	584.244
Slr0012 ribulose bisphosphate carboxylase small subunit	S[+79.966331]ENPNC[+57.021464]YIR_heavy	623.721	832.363	734.313	618.276	415.079	415.152
Slr0012 ribulose bisphosphate carboxylase small subunit	S[+79.966331]ENPNC[+57.021464]YIR_light	616.742	822.393	725.34	611.297	411.091	410.167
Slr0397 hypothetical protein	MVLT[+79.966331]QFASSPAPPQSFAVAPNR_heavy	808.693	785.393	393.194	781.378	1225.5
Slr0397 hypothetical protein	MVLT[+79.966331]QFASSPAPPQSFAVAPNR_light	799.387	774.426	386.215	773.402	1213.53
Slr0737 photosystem I subunit II	IGQNPEPVTIKFS[+79.966331]GK_heavy	571.937	539.278	771.424	653.275	523.186	425.209	375.121	745.336	845.401	947.446
Slr0737 photosystem I subunit II	IGQNPEPVTIKFS[+79.966331]GK_light	565.622	532.963	762.451	646.296	518.201	420.224	371.133	736.362	835.431	936.479
Slr0875 large-conductance mechanosensitive channel	LITTLENQQSSS[+79.966331]Q_heavy	773.323	1113.39	999.306	901.329	525.2	307.118	433.259	677.38
Slr0875 large-conductance mechanosensitive channel	LITTLENQQSSS[+79.966331]Q_light	764.848	1100.43	987.341	889.365	518.221	303.13	429.271	671.397
Slr1133 L-argininosuccinate lyase	S[+79.966331]RNDQVGTDVR_heavy	449.179	445.129	463.176	691.206	751.313
Slr1133 L-argininosuccinate lyase	S[+79.966331]RNDQVGTDVR_light	442.865	438.15	455.2	681.235	739.348
Slr1459 phycobilisome core component	AYFES[+79.966331]GSAR_heavy	540.196	565.184	339.17	515.207	683.202	585.225
Slr1459 phycobilisome core component	AYFES[+79.966331]GSAR_light	534.213	557.208	333.188	511.219	678.217	580.24
Slr1529 nitrogen assimilation regulatory protein	LTS[+79.966331]LFTNTIK_heavy	615.295	566.306	385.128	499.21	401.233	549.298	767.38
Slr1529 nitrogen assimilation regulatory protein	LTS[+79.966331]LFTNTIK_light	609.312	560.324	382.137	495.221	397.245	544.313	759.404
Slr1856 phosphoprotein substrate of icfG gene cluster	ILLDM[+15.994915]TAVPYM[+15.994915]SS[+79.966331]AGLR_heavy	985.43	936.441	1189.47	1091.5	1089.41	991.431	991.358	827.298
Slr1856 phosphoprotein substrate of icfG gene cluster	ILLDM[+15.994915]TAVPYM[+15.994915]SS[+79.966331]AGLR_light	975.459	926.471	1176.51	1078.54	1077.44	979.467	980.391	817.327
Slr1859 anti-sigma f factor antagonist	LVLM[+15.994915]M[+15.994915]DQLEYM[+15.994915]SS[+79.966331]AGLR_heavy	1053.43	1004.44	1235.48	1137.5	1121.4	1023.42	991.358	893.381	827.298	871.376	985.457
Slr1859 anti-sigma f factor antagonist	LVLM[+15.994915]M[+15.994915]DQLEYM[+15.994915]SS[+79.966331]AGLR_light	1042.96	993.97	1222.52	1124.54	1109.43	1011.46	980.391	882.414	817.327	863.4	976.484
Slr1963 water-soluble carotenoid protein	IAEPVVPPQDTAS[+79.966331]R_heavy	789.35	740.362	1261.54	1163.56	1163.49	1065.51	1063.42	965.446	963.358	865.381	865.308	767.331	669.281	419.137
Slr1963 water-soluble carotenoid protein	IAEPVVPPQDTAS[+79.966331]R_light	780.377	731.388	1246.58	1148.61	1149.53	1051.55	1050.46	952.485	951.393	853.416	854.34	756.364	659.311	413.154
Slr2002 cyanophycin synthetase	S[+79.966331]GGETADLIVK_heavy	591.258	542.27	517.124	705.182	607.205	935.433
Slr2002 cyanophycin synthetase	S[+79.966331]GGETADLIVK_light	585.276	536.288	512.139	698.203	600.226	925.462
Slr2051 phycobilisome rod-core linker polypeptide	S[+79.966331]INPAANTIPK_heavy	610.279	561.291	463.283	361.238	399.121	569.205	641.239	543.262
Slr2051 phycobilisome rod-core linker polypeptide	S[+79.966331]INPAANTIPK_light	603.3	554.312	458.297	357.25	395.133	563.222	634.26	536.283
Slr2067 allophycocyanin alpha subunit	IAETLTGSRET[+79.966331]IVK_heavy	808.387	759.398	981.441	835.393	675.304	577.327	545.264	781.38	941.47
Slr2067 allophycocyanin alpha subunit	IAETLTGSRET[+79.966331]IVK_light	799.413	750.425	969.476	825.423	669.322	571.345	540.279	773.404	929.505
Slr2067 allophycocyanin alpha subunit	S[+79.966331]LGTPIEAVAQSVR_heavy	763.353	714.364	345.17	557.301	785.317	957.417	859.44
Slr2067 allophycocyanin alpha subunit	S[+79.966331]LGTPIEAVAQSVR_light	754.379	705.391	341.182	551.319	778.338	948.444	850.467
Slr2067 allophycocyanin alpha subunit	Y[+79.966331]LSPGELDR_heavy	571.232	522.244	447.144	349.167	603.212	505.236	733.252	635.275
Slr2067 allophycocyanin alpha subunit	Y[+79.966331]LSPGELDR_light	565.25	516.261	444.153	346.176	598.227	500.25	727.27	629.293
Slr2094 fructose-1,6-/sedoheptulose-1,7-bisphosphatase	LAS[+79.966331]MGIK_heavy	404.181	355.192	187.123	355.118	257.141	487.155	561.278
Slr2094 fructose-1,6-/sedoheptulose-1,7-bisphosphatase	LAS[+79.966331]MGIK_light	400.193	351.204	185.129	352.127	254.15	483.167	555.296
Slr6001 two-component hybrid sensor and regulator	IY[+79.966331]SELGEGTSIK_heavy	695.302	646.313	943.459	699.338	593.288	879.323	937.341	941.409
Slr6001 two-component hybrid sensor and regulator	IY[+79.966331]SELGEGTSIK_light	688.821	639.832	933.489	691.362	588.303	872.344	929.365	932.436
Ssl0707 nitrogen regulatory protein P-II	YRGS[+79.966331]EYTVEFLQK_heavy	573.245	540.586	771.411	671.346	541.306
Ssl0707 nitrogen regulatory protein P-II	YRGS[+79.966331]EYTVEFLQK_heavy	859.363	873.456	771.411	671.346	1177.42	1079.44	1325.49
Ssl0707 nitrogen regulatory protein P-II	YRGS[+79.966331]EYTVEFLQK_light	567.262	534.604	763.435	664.366	535.324
Ssl0707 nitrogen regulatory protein P-II	YRGS[+79.966331]EYTVEFLQK_light	850.39	864.482	763.435	664.366	1165.46	1067.48	1312.52
Ssr1789 CAB/ELIP/HLIP-related protein HliD	MS[+79.966331]EELQPNQTPVQEDPK_heavy	1036.41	987.424	923.433	821.388	1149.39	1051.42	1349.49	1351.58
Ssr1789 CAB/ELIP/HLIP-related protein HliD	MS[+79.966331]EELQPNQTPVQEDPK_light	1025.45	976.457	913.462	812.415	1137.43	1039.45	1335.53	1336.62
Ssr3383 phycobilisome small core linker polypeptide	IT[+79.966331]AC[+57.021464]VPSQTRIR_heavy	750.84	701.852	871.454	773.404	685.375	555.322	630.227	728.277
Ssr3383 phycobilisome small core linker polypeptide	IT[+79.966331]AC[+57.021464]VPSQTRIR_light	741.368	692.38	857.495	760.442	673.41	545.352	625.241	722.294
Ssr3383 phycobilisome small core linker polypeptide	ITAC[+57.021464]VPS[+79.966331]QT[+79.966331]R_heavy	653.738	894.389	920.332	822.355	857.281	759.304	661.328	659.239	561.262	659.166	561.189	463.212	491.171	648.31
Ssr3383 phycobilisome small core linker polypeptide	ITAC[+57.021464]VPS[+79.966331]QT[+79.966331]R_light	646.759	882.425	909.365	811.388	847.311	749.334	651.357	650.266	552.289	651.19	553.213	455.236	484.192	642.328
Ssr3383 phycobilisome small core linker polypeptide	ITAC[+57.021464]VPS[+79.966331]QTRIR_heavy	750.84	853.37	685.375	555.322	453.277	289.167	450.195	550.26
Ssr3383 phycobilisome small core linker polypeptide	ITAC[+57.021464]VPS[+79.966331]QTRIR_light	741.368	840.409	673.41	545.352	444.304	286.176	446.207	545.275

## Sheet: Table S2
Table S2 Proteome and phosphoproteome data obtained in this study
		Relative protein abundance (Mean values were employed when abundances of multiple peptides were measured)
Protein		Auto1	Auto2	Auto3	Dark1	Dark2	Dark3	Hetero1	Hetero2	Hetero3	Mixo1	Mixo2	Mixo3	N24_1	N24_2	N24_3	N48_1	N48_2	N48_3
GlgA1_Sll0945		0.890092	1.02104	1.10032	1.18182	0.754506	0.946173	0.866138	0.876766	0.545959	0.827525	0.790307	0.892898	1.39932	1.26456	0.97416	0.952603	1.09127	1.05202
GlgA2_Sll1393		0.996044	0.992654	1.0114	1.64038	1.42885	1.72341	0.941512	0.903203	1.09439	1.13914	0.879492	1.43492	2.07415	2.02358	1.62782	2.88671	2.529	2.24149
GlgB_Sll0158		0.865478	1.04331	1.10747	1.52339	1.40751	1.63468	1.26442	1.17641	1.08423	1.5622	1.62857	1.52196	2.13079	1.57871	1.59162	2.26339	2.67092	2.08939
GlgC_Slr1176		0.955913	1.08904	0.960594	1.24736	0.839244	1.04176	0.87621	0.884352	0.73922	1.06621	0.98653	0.971769	1.36507	1.19745	0.94281	1.53277	1.61888	1.28658
Sps_Sll0045		0.93018	1.10607	0.971967	0.701594	0.732554	0.938585	0.974043	1.13024	0.880471	0.817978	0.792762	0.859677	1.12774	0.786038	1.08945	0.675291	0.633058	0.942779
Ebg_Slr0897		0.856464	1.00079	1.16666	0.830738	0.928618	1.01327	1.24877	1.2823	1.20974	1.11098	0.903176	0.950339	1.10039	1.04405	0.706709	0.390819	0.320086	0.350439
GlgP1_Sll1356		0.900939	1.06175	1.04539	1.5225	1.19743	1.26494	0.905258	0.732828	0.744447	0.64267	0.623848	0.599592	1.57804	1.59579	1.22999	1.92424	1.96845	1.70358
GlgP2_Slr1367		0.952302	1.0292	1.0203	0.806938	0.610899	1.08351	1.31307	1.54522	1.42083	1.86573	1.49515	1.75863	1.8492	1.30812	1.54286	3.01346	3.35274	2.70111
GlgX_Slr1857		0.773931	1.20465	1.0726	1.18827	1.06485	1.47544	0.751155	0.99345	0.695619	1.19309	1.6188	0.89408	2.02519	1.70013	1.49583	2.9427	3.47715	3.11645
MalQ_Sll1676		0.837957	1.1674	1.02225	0.884185	0.767264	1.18901	0.391237	0.42066	0.318696	0.582021	0.721387	0.5	1.54207	1.37446	1.37888	2.83945	2.22826	2.22928
NplT_Sll0842		0.736239	1.24491	1.09105	1.22049	1.20214	1.02484	1.44514	1.52962	1.44465	1.01201	1.34032	1.23788	1.35512	1.34261	1.31749	1.28128	1.52551	1.31314
Pgm_Sll0726		0.787481	1.04184	1.21887	1.36753	1.11103	1.35561	0.921274	1.02812	0.967003	1.61941	1.2916	1.51727	1.76522	1.39781	1.36141	1.88281	2.01749	1.65612
CbbA_Sll0018		0.750302	1.09701	1.21494	1.28716	1.34488	1.50721	0.896497	0.906787	0.872743	1.94325	1.54866	1.78204	1.12913	0.978634	0.87834	1.00174	1.06179	0.995601
Fbp_Slr0952		1.03825	0.955227	1.00831	1.54508	1.47082	1.54118	1.63664	1.43138	1.30966	1.48563	1.40529	1.42822	1.37211	1.20691	1.12674	1.48004	1.57665	1.40025
Gap1_Slr0884		0.894791	0.9718	1.15001	1.48257	1.48803	1.58001	1.05616	1.08851	0.909513	1.39125	1.42744	1.21153	3.2283	2.82522	2.59299	5.98047	7.11278	5.26954
Gap2_Sll1342		0.850879	1.07468	1.09358	1.19048	1.24444	1.66445	1.68354	1.65821	1.57586	1.89805	1.64526	1.71138	1.40555	1.16726	1.06892	1.4272	1.55397	1.20563
GlpX_Slr2094		1.0402	0.9407	1.02195	1.15833	1.11046	1.2521	0.706361	0.711434	0.677188	1.1944	1.29699	1.08516	1.5283	1.26322	1.0746	1.49382	1.62235	1.19942
OdhB_Sll1841		0.976343	1.08628	0.942878	1.13863	1.01782	1.17696	1.27715	1.25896	1.10965	1.34067	1.00842	1.22186	1.94941	1.60177	1.60956	2.15607	2.28394	2.09597
PdhB_Sll1721		0.907375	1.086	1.01481	1.23801	1.13607	1.19472	1.32109	1.42623	1.35203	1.39701	1.33286	1.45536	1.57451	1.2205	1.29851	1.38056	1.53376	1.34012
PfkA1_Sll0745		0.914925	1.00276	1.08998	0.968831	1.14712	1.28272	1.665	1.35897	0.914152	0.844222	0.595738	0.6215	0.454241	0.623686	0.355223	0.160973	0.236215	0.203728
PfkA2_Sll1196		0.864604	0.963537	1.20037	1.29037	0.888111	1.14066	0.920838	1.09529	0.993204	0.56646	0.895683	0.914434	2.05849	1.92098	2.14076	3.98212	3.92783	2.83514
Pgi_Slr1349		0.868586	1.02688	1.12115	0.643476	1.76875	1.23099	1.33957	1.43669	1.2162	0.957816	0.613178	0.707341	0.483087	0.487651	0.852294	0.412632	0.551141	0.666573
Pgk_Slr0394		0.887677	1.00418	1.12185	2.30003	1.93353	1.29802	0.642438	0.542583	1.41559	3.30225	1.7879	3.0831	1.48854	1.35779	1.0664	1.32747	1.49324	1.25255
Prk_Sll1525		0.939207	0.982525	1.08366	1.18666	1.22066	1.12579	1.12903	1.16307	1.23388	1.77481	1.83923	1.64609	1.06294	0.881755	0.819236	0.678278	0.711983	0.654606
PykF_Sll1275		0.905199	1.23359	0.895539	1.41755	0.924027	0.957315	1.07395	1.21541	1.09119	1.24947	1.05201	1.24461	1.29381	0.91472	1.0534	0.741584	0.979473	0.684294
TpiA_Slr0783		0.989118	0.996672	1.01438	1.09326	0.879298	1.38689	0.99474	1.28374	1.23518	1.40144	1.56401	1.68604	2.00979	1.50603	1.28532	1.92732	1.94841	1.6752
XylR_Slr0329		1.19144	0.929524	0.902961	1.3185	0.905058	1.29282	0.869062	1.0816	0.857527	0.949565	1.35621	0.837429	1.34031	1.16326	1.03938	0.626999	0.517105	0.606332
CfxE_Sll0807		0.909248	1.03209	1.06561	1.17611	1.14397	1.34498	0.61731	0.649705	0.624215	1.5608	1.33171	1.28959	1.11195	0.949472	0.891826	0.808245	0.889154	0.752511
Gnd_Sll0329		0.89255	1.00279	1.11727	1.21497	1.14095	1.3188	1.30326	1.40567	1.27661	1.03496	0.920917	0.931921	2.24479	1.78255	1.80605	3.17652	3.33842	2.67095
OpcA_Slr1734		0.828173	1.11185	1.08601	1.1116	1.04264	1.14058	1.14652	1.24925	1.19856	1.03702	1.11028	0.884638	1.39658	1.18025	1.16189	0.999918	1.32297	1.075
RpiA_Slr0194		0.812513	1.04219	1.18093	1.23971	1.1961	1.36962	1.20103	1.17407	1.24059	1.85975	1.46225	1.82357	1.36911	1.2142	0.994276	1.09947	1.25734	1.1971
TalB_Slr1793		0.932973	0.987766	1.08512	1.16113	0.987497	1.48164	1.17471	1.20551	1.13715	0.875718	0.803424	0.771199	2.0395	1.73658	1.6771	2.55249	2.19376	1.83545
TktA_Sll1070		0.913431	1.01176	1.08204	1.194	1.14451	1.34739	1.34907	1.48823	1.29834	1.91554	1.79909	1.72229	1.51898	1.31774	1.19838	1.48925	1.54319	1.38005
Zwf_Slr1843		0.878377	0.956487	1.19026	1.21235	1.07942	1.30471	0.706113	0.74568	0.644499	0.657561	0.646658	0.675177	2.00981	1.56126	1.44746	2.07286	2.45691	2.11928
XylK_Slr0453		0.862512	1.05205	1.10204	1.12031	1.48184	1.89637	1.21336	0.947296	1.29422	0.809715	0.434152	0.505529	1.69353	1.16064	1.06734	1.14092	0.922723	1.14714
RbcL_Slr0009		0.838624	1.06529	1.11934	0.973804	0.933128	1.09917	0.25252	0.274446	0.257934	0.833435	0.712323	0.741213	1.12857	1.02241	0.890995	0.664837	0.748139	0.699013
RbcS_Slr0012		0.797944	0.988467	1.26784	0.63651	0.940702	0.850818	0.30568	0.323011	0.288964	0.803257	0.869248	0.88843	1.41761	1.09205	1.09566	2.41084	2.86969	2.40505
Ppc_Sll0920		1.33948	0.811516	0.919954	1.1344	1.14432	1.15099	0.560428	0.746048	0.559714	1.08114	1.7581	0.761465	1.58949	1.28124	1.42355	1.58962	1.73572	1.76134
CcmK1_Sll1028		0.842947	1.04801	1.13197	1.07877	1.04681	1.19722	0.298155	0.324774	0.291474	0.624294	0.648178	0.636146	1.71089	1.4002	1.31369	2.27199	2.46108	2.16619
CcmK2_Sll1029		0.906975	1.03415	1.06616	1.09758	1.01308	1.19627	0.289763	0.313117	0.311316	0.702829	0.629678	0.633346	1.7597	1.41502	1.42089	2.39461	2.549	2.26261
CcmM_Sll1031		0.751041	1.23085	1.08176	1.69412	1.533	1.53572	0.742054	0.897733	1.03267	1.61264	1.72066	1.44621	2.01773	1.92584	1.81372	2.43694	2.96593	2.28882
IcfA_Slr0051		0.929194	1.05252	1.0225	1.08898	1.23103	1.11675	1.37018	1.44452	1.45159	1.08782	1.25691	1.08853	1.48171	1.1762	1.18874	0.923863	1.04659	1.06941
AcnB_Slr0665		0.895279	0.924968	1.20758	1.21968	1.00909	1.35557	0.793781	0.986694	0.965725	1.62235	1.35912	1.20804	2.16409	1.67542	2.06749	3.48681	4.72373	3.18277
CitH_Sll0891		0.768735	1.11982	1.16165	1.11264	1.53454	1.31535	1.79963	1.82539	1.46658	1.32886	1.99135	1.42579	1.91523	2.0626	1.48563	1.73267	1.45015	1.2304
GabD_Slr0370		0.871697	1.0236	1.12074	1.14338	0.831509	1.13241	0.62333	0.622153	0.624584	0.743332	0.648001	0.685351	1.96542	1.57081	1.5572	2.5208	2.46876	1.82952
Me_Slr0721		1.44955	0.768114	0.898131	1.09328	1.38832	1.07149	0.766349	0.577847	0.764506	0.935379	1.77939	0.986773	1.87244	1.54475	1.46012	1.61886	1.82428	1.82069
SdhA_Slr1233		0.86043	1.01668	1.14315	1.23238	1.20337	1.37138	0.673802	0.669998	0.665238	0.628431	0.554488	0.596167	2.06489	1.6831	1.53861	2.21631	2.75644	2.01961
SdhB_Sll1625		0.887552	1.10502	1.01961	0.986221	0.70251	0.713388	1.11823	0.855035	0.747616	0.809125	0.556627	0.486269	0.625479	0.713472	0.508393	0.161748	0.158939	0.162829
ArgG_Slr0585		0.760936	1.09999	1.19471	1.21726	1.0714	1.45969	0.826757	1.05063	0.878391	1.23365	1.21696	1.34931	2.41156	1.82401	1.63293	3.69024	3.94447	2.68673
Asd_Slr0549		0.737682	1.26263	1.07363	1.58178	0.881334	1.29313	0.968989	0.845733	0.777576	1.69065	1.21581	1.42573	1.55212	1.334	1.3794	1.89249	2.10996	1.89085
IlvB_Sll1981		0.786724	1.04822	1.21262	1.1683	1.17785	1.37307	0.613297	0.592375	0.622653	0.57278	0.647608	0.561492	1.60227	1.2086	1.28219	1.32295	1.78045	1.58036
IlvC_Sll1363		0.765234	1.12423	1.16239	1.32934	1.1153	1.45058	1.25709	1.25923	1.36422	2.13729	2.03986	2.01979	1.31009	0.932622	1.07086	1.25111	1.34223	1.02795
GdhA_Slr0710		0.93089	1.06823	1.00562	1.0739	0.955273	1.47413	1.16616	1.19683	0.954133	1.34607	1.42452	1.38934	1.63999	1.60051	1.24324	1.89023	2.1152	1.72737
GlnA_Slr1756		0.830202	1.05779	1.13872	1.2235	1.13573	1.32147	0.703665	0.873166	0.766332	1.09765	0.976865	1.15492	2.50537	1.91009	1.99593	5.15406	2.9003	1.81877
GlnN_Slr0288		1.19692	1.04651	0.798349	0.369329	2.27279	0.846325	2.35842	6.11835	3.06537	2.30353	2.26369	2.20095	30.1736	21.7101	22.7229	60.0858	80.4899	62.2721
GltB1_Sll1499		1.136	0.864118	1.0187	1.16951	1.07344	0.794742	0.57352	0.839803	0.724669	0.737351	1.81145	0.687133	1.14859	0.965518	0.849778	0.37502	0.585406	0.739508
GltB2_Sll1502		0.840857	0.946124	1.25698	1.16972	1.01354	1.21272	1.25246	1.67731	1.44084	1.22785	1.22363	0.958205	1.50763	1.19108	1.36842	1.29945	1.17915	1.27999
GltD_Sll1027		0.894687	1.01843	1.09749	1.18821	1.04169	1.16008	1.46572	1.40441	1.54709	1.00571	1.45851	0.977827	1.24563	1.25429	1.17437	1.10766	1.05473	0.978359
NrtA_Sll1450		0.831627	1.05237	1.14263	0.916617	0.90823	0.991609	1.4159	1.5512	1.43518	1.13698	0.965595	1.03815	1.19701	1.09443	0.821613	0.518514	0.42081	0.473294
NrtC_Sll1452		0.986395	0.98117	1.03325	0.824389	0.73013	1.15105	1.07024	1.41177	1.21302	1.13058	1.19619	0.787269	1.23873	1.11011	1.22377	1.14667	0.98253	0.937555
NrtD_Sll1453		0.963491	0.953316	1.08872	0.969078	1.26187	0.917232	1.06945	1.43805	1.61442	1.21927	1.03146	0.734257	1.14442	1.16544	0.689706	0.76024	0.904051	0.826076
ApcA_Slr2067		0.932012	1.00388	1.0688	1.07203	1.11873	1.11509	1.27268	1.31888	1.31049	1.15491	1.24155	1.01157	1.64861	1.41717	1.30996	1.44035	1.39635	1.33289
ApcB_Slr1986		0.873068	1.02947	1.1126	0.960939	1.05562	1.24883	1.44026	1.52305	1.45718	1.10419	1.13416	1.10856	1.60027	1.23669	1.22991	1.22585	1.09692	1.08386
ApcC_Ssr3383		1.39803	0.813877	0.878867	2.35881	2.84603	2.79186	0.680793	0.888947	1.00607	1.1152	3.31809	0.909864	3.16627	2.52249	2.60824	4.30664	6.30926	6.69866
ApcD_Sll0928		0.939701	0.928469	1.14615	0.855315	1.20522	0.834634	0.794601	1.06424	0.982596	0.846373	1.08828	0.840742	1.85334	1.50792	1.58065	1.48	1.47968	1.48044
ApcE_Slr0335		0.883101	1.05046	1.07798	1.30202	1.24798	1.41974	1.66226	1.74847	1.58209	1.26144	1.21285	1.17895	1.50313	1.35122	1.24764	0.964875	0.829601	0.869737
ApcF_Slr1459		0.935522	0.978777	1.0921	1.10833	1.15987	1.18996	1.2705	1.30835	1.30001	1.38368	1.49976	1.35597	1.58882	1.30899	1.19293	1.16028	1.15879	1.11319
CpcA_Sll1578		1.20162	0.824898	1.00887	1.06483	1.11412	0.977136	0.563253	0.677466	0.675249	0.87467	1.84803	0.922544	1.56757	1.26209	1.24555	1.47866	1.54025	1.64151
CpcB_Sll1577		0.904118	1.03436	1.06931	1.14405	0.989033	1.20636	1.27186	1.32117	1.18161	1.11287	1.13117	1.01554	1.26489	1.13168	0.981977	0.636711	0.566595	0.564872
CpcC_Sll1579		0.766935	1.11289	1.17163	1.27343	1.09077	1.35828	2.14771	2.16357	2.04427	1.24289	0.982444	1.01025	0.240102	0.455207	0.244016	0.0958777	0.0650573	0.0780613
CpcC2_Sll1580		0.912234	0.945768	1.15907	1.25041	1.18865	1.42429	1.57632	1.52816	1.53379	1.22968	1.16022	1.11034	1.51849	1.36357	1.15297	0.380386	0.315157	0.400067
CpcD_Ssl3093		0.904173	0.989359	1.11788	1.17397	1.1708	1.2234	1.14644	1.30018	1.38626	1.26042	1.52927	1.00438	1.53768	1.44577	1.25512	1.45722	1.26864	1.49611
CpcE_Slr1878		0.954278	0.946903	1.10667	1.29555	1.5697	1.34671	1.72086	2.04161	1.36288	2.42651	2.98643	2.04532	1.77643	1.33509	1.24924	2.11966	1.89713	1.61233
CpcG_Slr2051		1.06405	0.933057	1.00723	0.849913	0.977565	0.745598	0.553279	0.706688	0.681093	0.969514	1.52225	0.916828	1.8283	1.48764	1.55784	1.59499	1.39621	1.4872
Psb13_Sll1398		1.0469	0.875146	1.09148	1.25661	1.4885	1.05513	1.051	1.35973	1.27563	1.23995	1.97836	1.06896	2.00957	1.67156	1.94266	3.79258	4.98601	4.25661
PsbA2_Slr1311		0.871837	1.06333	1.07869	1.34413	1.10703	1.33132	2.45038	3.1066	2.67972	0.97629	0.812987	1.00579	1.46719	1.23054	1.08938	0.809125	0.95894	0.811906
PsbB_Slr0906		0.883883	1.0777	1.0498	1.50279	1.26363	1.52132	2.85592	3.55599	3.01782	1.22418	1.07641	1.04188	1.4675	1.381	1.16187	0.828536	0.945124	0.751746
PsbC_Sll0851		0.746064	1.04445	1.28332	1.40428	1.22085	1.55653	2.52066	3.78793	2.84446	1.1544	0.745861	1.02307	1.35536	1.58905	1.30906	0.969086	1.04398	0.846057
PsbD_Sll0849		0.913832	1.04127	1.05092	1.36385	0.955186	1.26657	2.10078	3.22037	3.40396	1.01337	0.952788	0.845089	1.4967	1.30947	1.15065	1.02161	1.0626	0.773753
PsbO_Sll0427		0.865417	1.04671	1.10395	0.917472	0.822451	0.888804	1.21827	1.31278	1.10284	0.624599	0.639632	0.572677	2.00826	1.75693	1.71346	2.18777	2.42407	2.10857
PsbP_Sll1418		1.20123	0.91663	0.908197	0.429478	0.356711	0.503531	0.385723	0.470651	0.375781	0.554339	0.732442	0.567504	1.22351	1.19983	1.24869	1.62647	1.29217	1.172
PsbV_Sll0258		1.31712	0.845581	0.89788	1.19952	1.62698	1.86207	0.587869	0.6704	0.60152	0.552746	0.884734	0.347857	2.66221	1.75727	2.15096	4.05317	5.46815	5.2445
PsbZ_Slr1645		0.82511	0.993142	1.22033	1.34297	1.2911	1.56931	2.12622	2.54141	2.30234	1.12554	1.47972	1.04093	1.4036	1.40972	1.37552	1.01831	1.22137	0.96914
Slr0399_Slr0399		0.891541	1.03249	1.08636	0.66923	0.657656	0.75394	0.801014	0.825036	0.808893	0.607172	0.636096	0.615427	1.47642	1.17292	1.12266	1.04418	0.988928	0.98698
Ycf48_Slr2034		0.956888	1.06531	0.980985	2.00007	1.95619	2.38701	1.28514	2.00935	2.03361	3.22534	2.80666	2.78534	1.18347	0.836053	0.738234	0.993704	1.20107	1.02746
PetA_Sll1317		0.793074	1.08412	1.16308	1.68798	1.4503	1.65113	1.70847	2.40654	2.04275	1.11522	1.04672	1.06176	1.55344	1.41912	1.44875	1.09216	1.32141	1.19778
PetC_Sll1182		0.848054	1.13312	1.04064	1.67835	1.596	1.68549	0.440969	0.506902	0.40641	1.33468	1.19876	1.21324	0.754126	0.639347	0.616275	0.259484	0.400907	0.367506
PetC3_Slr1185		0.936579	0.976051	1.09391	0.989107	0.982767	1.05177	1.26654	1.32453	1.29334	1.05893	0.989882	0.82	1.35822	1.16424	1.02572	0.674593	0.64326	0.636625
PetE_Sll0199		0.911524	0.910017	1.20554	1.15068	1.19593	1.20416	0.772891	0.869521	0.907827	0.772801	0.944035	0.703312	1.85006	1.60758	1.56251	2.83149	3.46507	3.00709
PetF_Sll1382		0.851397	1.02219	1.14905	1.03049	1.05466	1.09086	1.05655	1.06677	1.01747	0.864164	0.958276	0.853894	1.18314	1.13497	0.972056	0.620247	0.558427	0.62727
PetH_Slr1643		0.908724	1.03611	1.0621	1.16583	1.03992	1.28755	0.992356	1.05357	0.947636	1.44811	1.36328	1.33424	1.61466	1.43783	1.31975	2.11901	2.1227	1.73207
PetI_Sll1796		0.910193	1.02001	1.07711	0.962839	1.14283	1.1324	1.28701	1.27682	1.21772	1.12294	1.20761	0.98087	1.66805	1.39547	1.30232	1.43447	1.41635	1.35667
Flv_Sll0550		0.803722	1.27339	0.977086	1.11424	0.743383	0.919647	0.296671	0.179759	0.315108	0.433408	0.472474	0.55561	1.61239	1.4775	1.29519	1.94124	1.22713	1.69468
PsaA_Slr1834		0.790699	1.05734	1.19612	1.48527	1.35277	1.56536	1.80555	2.3378	2.10376	1.05216	0.870641	0.903544	2.20196	1.85939	1.66514	1.69767	1.764	1.37307
PsaD_Slr0737		0.888086	0.95909	1.17405	1.62854	1.71351	1.41908	1.26088	1.50859	2.2632	1.36165	1.23016	0.834165	2.45165	2.33873	1.88855	3.19857	4.45725	3.90206
PsaE_Ssr2831		0.876432	0.997686	1.14364	1.42436	1.20061	1.42182	1.18289	1.63351	1.83243	1.0867	1.2033	0.732961	2.36767	2.08289	1.9093	2.6784	3.41814	3.12145
PsaF_Sll0819		0.855059	1.03211	1.13313	1.35863	1.12449	1.28101	1.62404	2.09531	1.73215	0.946887	0.788499	0.673981	2.04498	1.75793	1.54627	1.79676	1.84754	1.60017
PsaJ_Sml0008		0.886327	1.06238	1.06201	0.627338	0.69623	0.561454	0.540032	0.589538	0.601475	0.850532	0.795289	0.935664	0.827584	0.85649	0.773152	0.801978	0.561973	0.523273
PsaL_Slr1655		0.836673	1.05338	1.13464	1.42888	1.01333	1.27025	1.56129	1.78815	1.4936	0.827179	0.788187	0.559582	2.11788	1.90775	1.5967	1.60009	1.75088	1.59507
BtpA_Sll0634		0.914997	1.02978	1.0613	2.03887	1.7413	1.78519	1.23917	1.34193	1.06718	1.81693	1.46625	1.81203	1.18006	1.09398	1.12587	1.19005	1.32614	1.03665
RubA_Slr2033		0.859292	1.02131	1.13947	1.27081	1.51945	1.65228	0.884002	1.09353	0.919966	1.22774	1.81288	1.29026	3.90048	2.84387	2.89589	8.93093	9.64361	7.3047
Ycf3_Slr0823		0.908802	0.972307	1.13169	1.22351	1.1717	1.3734	0.855686	0.978564	0.86743	1.41528	1.35551	1.1657	2.0522	1.59284	1.72584	2.56575	2.70504	2.22209
Ycf37_Slr0171		0.744584	1.03359	1.29939	0.915435	1.04656	1.01611	1.42291	1.44046	1.62027	1.09526	0.825996	1.05476	1.08902	1.07084	0.875835	0.395179	0.464709	0.484549
AtpA_Sll1326		0.856567	1.03459	1.12842	1.26006	1.08818	1.29232	2.19091	2.43991	2.15969	1.63951	1.51349	1.47127	2.02017	1.75355	1.73014	1.53886	1.71257	1.45643
AtpB_Slr1329		0.822408	1.11512	1.09041	1.1847	1.01866	1.28106	1.96344	2.3389	1.91184	1.70538	1.65061	1.42558	2.07651	1.81345	1.75522	1.67989	2.00226	1.56036
AtpC_Sll1327		0.853011	0.97006	1.2085	1.27559	1.02528	1.34862	2.27142	2.46694	2.23391	1.61826	1.51802	1.38586	2.0708	1.72068	1.53265	1.15576	1.27151	1.14164
AtpD_Sll1325		0.907711	1.05612	1.04313	1.16357	1.06124	1.03892	2.20112	2.50039	2.32851	1.59888	1.56109	1.65307	1.99343	1.84334	1.43223	1.60747	1.60076	1.46036
AtpE_Slr1330		0.86633	0.930393	1.24065	1.00981	0.918796	1.04653	1.5513	1.42119	1.27044	1.42744	2.20916	1.50274	2.24281	1.58325	1.68339	2.59938	3.08684	2.32958
AtpF_Sll1324		0.76828	1.21923	1.06757	1.41795	1.4437	1.54354	2.65779	2.59669	2.28416	1.42643	1.62077	1.4757	1.83484	1.92944	1.77337	1.6729	2.03271	1.71402
AtpG_Sll1323		0.948347	0.994704	1.06008	1.48714	1.07065	1.37701	2.22974	2.29597	2.04422	1.29338	1.53682	1.23431	2.18939	1.89327	1.79138	2.13806	2.45265	1.81304
AtpI_Sll1322		0.736777	1.15253	1.17764	0.852482	0.876059	0.992263	1.17872	1.24317	1.21999	1.02214	0.826672	0.843488	1.20552	1.08146	0.733939	0.502	0.425892	0.443426
Abr1_Sll0359		0.883391	1.03036	1.09865	1.30255	1.31739	1.54272	0.89218	0.992704	0.829501	1.10067	1.09955	1.01045	1.98431	1.59154	1.59597	3.14551	2.99319	2.47635
HikX_Slr0073		0.823273	1.16759	1.04032	1.19402	0.97968	1.47499	0.701869	0.877003	0.976492	1.0223	0.403812	1.20904	2.04282	1.48095	1.65634	1.90314	2.22589	1.97011
LexA_Sll1626		0.868729	1.02888	1.11879	1.33366	1.48004	1.51517	1.0213	1.10626	1.00764	1.27016	1.5014	1.22287	2.09047	1.68191	1.57045	2.49646	2.84721	2.15111
PknA_Slr1225		1.06106	0.782964	1.20371	1.18357	0.913662	0.860651	0.444315	0.612387	0.535356	1.07763	1.97944	0.803096	1.51546	0.982946	1.51854	1.61149	1.57772	1.18053
RpaB_Slr0947		1.0535	0.893045	1.0629	1.00178	0.994111	1.00374	0.756709	0.777709	0.753587	0.891659	1.28049	0.839669	2.06089	1.62245	1.49039	2.11265	2.41447	2.02306
RpoD_Sll0184		0.997551	0.859221	1.1667	1.31164	0.898765	0.994489	1.68558	1.31061	1.62394	1.08059	0.724048	1.29239	1.02588	0.908405	0.834144	0.51073	0.474033	0.37887
TrxA_Slr0623		0.989425	0.946105	1.06826	1.04041	1.16089	1.05847	0.49922	0.600499	0.570494	0.81548	1.39356	0.782157	1.55598	1.32206	1.21553	2.10453	2.4352	2.27004
AckA_Sll1299		0.90818	1.03749	1.06131	0.988424	0.939476	1.22176	1.31365	1.18599	1.20799	1.07678	1.1519	0.829206	1.22361	1.14218	1.03749	0.635908	0.656611	0.636873
Acs_Sll0542		0.815694	0.927363	1.32197	1.78284	1.27911	1.48316	0.771749	0.882032	1.05599	0.868361	0.787666	0.611008	1.62611	1.90691	1.33645	1.05756	1.75699	1.33854
Arp_Slr1748		0.97151	0.888662	1.15829	0.872774	0.906292	0.784112	1.20465	1.18547	0.857934	1.00763	0.773448	0.822814	1.24698	1.15154	1.32336	0.765314	0.547281	0.535716
CphA_Slr2002		0.900325	1.09764	1.01191	0.947055	1.1692	1.44592	1.11864	1.19277	1.18562	1.30485	1.55924	1.46003	4.18243	2.21635	3.15282	5.57297	5.4983	4.51179
HrEpiB_Sll0576		0.840951	1.07433	1.10686	1.44246	1.11181	1.46154	0.763157	1.0479	0.748962	2.19981	1.82866	1.71824	1.80054	1.56017	1.48345	1.72912	1.90762	1.74426
ParA_Slr0929		0.718975	1.43275	0.970765	0.981497	1.39442	1.22424	0.699582	0.950682	1.37358	1.4112	1.04191	1.10689	1.53659	1.87553	1.31817	1.06685	1.331	1.07995
PhdD_Slr1096		0.943481	1.07336	0.987465	1.21763	1.11253	1.22318	1.3554	1.2674	1.27	1.37419	1.48068	1.12831	1.89929	1.3996	1.56756	2.04282	2.32549	1.83873
AccA_Sll0728		1.06165	0.976726	0.964372	1.30276	1.21145	1.62653	1.51664	1.22205	1.41812	1.2043	1.43796	1.18205	1.48093	1.32412	1.16449	0.813235	0.8452	0.759823
AccB_Slr0435		0.857019	0.942408	1.23814	0.965407	1.59452	0.950035	0.506656	0.894858	0.893537	1.03362	0.959529	0.654028	1.72576	1.88741	1.74285	2.87441	3.16991	2.56807
Thl_Slr1993		0.849757	1.11323	1.05711	0.675489	0.794068	0.835574	0.836031	0.997868	1.00394	0.639965	0.789406	0.659819	0.915503	0.855851	0.859696	0.57815	0.562084	0.629166
		Relative phosphorylation ratio
Protein	Peptide	Auto1	Auto2	Auto3	Dark1	Dark2	Dark3	Hetero1	Hetero2	Hetero3	Mixo1	Mixo2	Mixo3	N24_1	N24_2	N24_3	N48_1	N48_2	N48_3
PsbV_sll0258	pTIPLDEAGGTTTLTAR	0.922838	0.864324	1.25371	1.23974	1.41714	0.985908	1.02956	1.25851	1.46976	3.32272	2.96526	6.7656	1.82075	2.50284	3.01936	1.62054	2.14948	2.13887
pgm_sll0726	EGLADGIIITPpSHNPPTDGGFK	1.21451	0.991386	0.830534	1.67911	2.38954	2.35802	0.785128	0.603653	0.958436	0.706399	0.912106	0.851019	0.785372	0.778422	0.726373	1.3493	1.30495	1.16819
ccmM_sll1031	VLEpTIIQRP	1.10197	0.836828	1.08441	0.305836	0.482954	0.402543	0.707138	0.401447	0.424499	0.470888	0.688053	0.606153	4.21359	6.46381	5.99913	5.29888	1.89657	2.24323
CpcB_sll1577	GEYLpSGSQLDALSATVAEGNK	1.03122	1.08917	0.890336	0.769416	1.05937	0.766732	0.348055	0.348902	0.45793	0.410108	0.395674	0.41119	1.46513	1.44005	1.14627	1.73199	2.14196	2.16544
CpcA_sll1578	MKpTPLTEAVSTADSQGR	0.940306	0.746341	1.42493	1.65447	1.47871	1.59407	2.84342	2.87716	3.57989	2.99642	1.49371	2.8455	0.606633	1.01878	1.0089	0.898293	0.74194	0.685242
rbcL_slr0009	LpSGGDHLHSGTVVGK	1.35749	1.72701	0.42655	2.51797	3.01948	2.60657	4.21744	3.57831	4.88364	2.56876	1.43978	3.02478	1.44463	1.48015	1.93386	5.2225	3.62647	3.27596
rbcL_slr0009	pTFQGPPHGIpTVER	1.10652	0.89885	1.00544	1.28329	1.17137	1.0287	5.99818	5.25541	5.63123	1.28857	1.78476	1.237	1.07623	0.889178	0.574398	0.902841	0.848244	0.944524
rbcL_slr0009	GGLDFTKDDENINpSQPFMR	1.10712	1.25418	0.720186	0.978907	0.733579	0.755608	3.01519	2.68328	2.26434	0.775982	1.37926	0.787201	1.02626	1.26617	1.39215	0.9499	0.880883	0.766107
rbcL_slr0009	EDpYVEEDR	1.69999	0.732841	0.802683	2.0098	1.22906	0.871329	2.10274	1.73767	2.28655	1.07936	1.75998	1.56761	5.09599	6.22532	6.35904	9.1479	15.1846	12.7208
rbcS_slr0012	pSENPNCYIR	1.68189	0.676003	0.879536	2.35822	2.49873	1.96249	2.14738	2.89772	2.02259	1.55393	3.55939	1.13802	1.05276	0.924785	1.03714	0.346799	0.437156	0.744279
dvf_slr0397	MVLpTQFASSPAPPQSFAVAPNR	1.10138	0.920169	0.986725	1.00453	1.05468	0.879316	1.27562	1.24276	1.41011	1.31686	1.22769	1.12247	0.689134	0.958424	0.377663	0.792217	0.709842	0.766175
psaD_slr0737	IGQNPEPVTIKFpSGK	1.45045	0.982133	0.701985	0.437298	0.636583	0.572372	0.472559	0.329922	0.250589	0.74964	1.07251	1.33447	3.71209	2.05815	2.59557	2.10336	2.02724	1.85522
mscL_slr0875	LITTLENQQSSpSQ	1.35695	0.830296	0.887571	1.12146	0.881009	0.985461	7.43153	6.82382	6.08801	4.98954	3.79434	3.34731	0.966362	0.814234	1.25682	1.63165	1.96842	1.71347
argH_slr1133	pSRNDQVGTDVR	0.793533	1.51194	0.83349	0.570827	0.328734	0.276671	0.330337	0.393449	0.394222	0.915079	0.548814	0.458218	0.352254	0.584171	0.441434	0.999067	0.623409	0.537683
ApcF_slr1459	AYFEpSGSAR	1.44856	0.616937	1.11898	1.03465	0.654143	1.18694	0.853422	0.944176	1.04578	1.1037	0.923195	1.09019	0.334613	0.390567	0.313175	0.22178	0.355367	0.220614
ntrX_slr1529	LTpSLFTNTIK	1.10562	0.735295	1.23008	1.1863	0.913293	0.771055	0.967153	0.989654	1.20827	0.52152	0.513615	0.26074	0.885549	1.34518	0.866783	1.17926	1.28341	0.86236
anti-sigB1_slr1856	ILLDMTAVPYMSpSAGLR	0.738082	1.0511	1.289	1.96596	2.52846	2.6552	0.47242	0.590282	0.504444	0.706091	0.750255	0.622905	3.42301	2.38539	1.99983	1.89895	2.13833	1.5531
anti-sigB2_slr1859	LVLMMDQLEYMSpSAGLR	1.22998	0.944935	0.860399	2.08638	2.95598	2.84517	0.27411	0.160097	0.309186	1.20789	1.73231	0.999776	5.01199	3.13125	6.55193	7.99935	7.37612	4.5534
OCP_slr1963	IAEPVVPPQDTApSR	1.29454	1.02107	0.756531	1.31201	0.61595	0.656657	0.429766	0.337859	0.692301	0.25553	0.651007	0.255726	1.58451	1.50318	1.78311	4.93763	3.36175	2.82777
cyaS_slr2002	pSGGETADLIVK	1.4152	0.835281	0.845957	0.715515	0.743105	0.71009	0.510176	0.33969	0.611077	0.804802	0.848048	0.696576	1.32586	2.02781	1.37841	0.998068	1.20539	1.17487
cpcG_slr2051	pSINPAANTIPK	1.44461	0.798699	0.866693	2.4037	1.91113	2.67132	0.981607	0.764263	0.861304	0.607937	1.48954	0.641099	1.24198	1.51865	1.41876	1.87858	4.2357	3.30254
ApcA_slr2067	pSLGTPIEAVAQSVR	1.28798	1.05187	0.738125	0.829976	0.537226	0.708422	0.864363	0.68499	0.562456	0.448514	0.647508	0.357763	0.990656	0.931817	0.91627	0.39483	0.299129	0.369601
ApcA_slr2067	pYLSPGELDR	1.52434	0.912381	0.719019	1.18808	1.44751	1.20653	1.20584	0.69179	0.868986	1.09384	1.50325	1.24617	3.01419	2.43201	3.10426	3.39497	6.13263	6.71954
ApcA_slr2067	IAETLTGSREpTIVK	0.963562	0.908512	1.14233	1.07077	0.98113	1.16775	1.17985	1.33538	1.15891	1.16528	0.830702	1.24857	0.97485	0.876009	0.810185	0.549635	0.427445	0.511738
glpX_slr2094	LApSMGIK	0.908559	1.03591	1.06249	0.680676	0.693047	0.676634	1.05451	1.16496	1.25616	0.852894	0.689386	0.903924	0.37379	0.466751	0.505234	0.140558	0.0992131	0.154734
rreX_slr6001	IpYSELGEGTSIK	1.20482	0.484981	1.71141	1.40151	1.84446	1.76922	1.45432	1.02209	1.78539	1.49779	0.893538	1.13631	0.958077	1.35147	0.984712	1.54256	1.38576	1.45044
PII_ssl0707	YRGpSEYTVEFLQK	1.69336	0.931389	0.634046	0.601355	0.713137	0.484371	0.473242	0.398073	0.566574	0.729497	0.788794	0.693886	3.07583	2.63717	3.58876	3.57352	2.04144	2.80566
hliA_ssr1789	MpSEELQPNQTPVQEDPK	1.23999	0.710766	1.13463	1.13657	1.24113	0.929945	0.508253	0.764499	0.801504	1.03192	2.07895	1.01976	1.65192	1.33891	1.46808	1.35494	1.48069	1.55329
ApcC_ssr3383	ITACVPpSQpTR	0.335964	2.35922	1.26165	0.308928	0.199217	0.233794	2.92474	2.07016	1.26317	0.94931	0.247352	0.807375	0.370109	0.204173	0.294623	0.160573	0.186971	0.0976825
ApcC_ssr3383	ITACVPpSQTRIR	0.445053	1.51267	1.48541	0.353706	0.32349	0.303454	0.37831	0.273567	0.250884	0.674741	0.197765	0.486472	0.447902	0.49193	0.28375	0.21227	0.102498	0.096577
ApcC_ssr3383	IpTACVPSQTRIR	0.566179	1.44809	1.21969	0.323117	0.324446	0.336084	0.367303	0.237909	0.221273	0.481991	0.162172	0.492862	0.382862	0.36703	0.332224	0.189111	0.0871897	0.0761897

## Sheet: Table S3
Table S3 Correlation coefficient between proteome and flux data.
Pathway	Protein	Correlation coefficient
glyocogen->G6P	GlgP_sll1356	0.86
	GlgP_slr1367	-0.56
	GlgX_slr1857	0.51
	MalQ_sll1676	0.9
	Pgm	0.02
(glyocogen<-G6P)	GlgA_sll0945	0.89
	GlgA_sll1393	0.53
	GlgB	-0.01
	GlgC	0.65
	Sps	0.66
	Slr0897	-0.55
G6P->6PG	Zwf	-0.44
6PG->Ru5P	Gnd	-0.32
Ru5P->X5P	CfxE	0.39
Ru5P->R5P	RpiA	-0.2
X5P->F6P	TktA	-0.39
R5P->GAP	TktA	-0.57
S7P->F6P	TalB	-0.46
F6P->FBP	PfkA_sll0745	0.01
	PfkA_sll1196	-0.1
	Fbp	-0.87
	GlpX	-0.27
FBP->DHAP	CbbA	-0.09
DHAP->GAP	TpiA	-0.56
GAP->PGA	Gap1	-0.24
	Gap2	-0.76
	Pgk	-0.1
	PykF_sll1275	0.14
Ru5P->RuBP	Prk	-0.17
Ru5P->PGA	RbcL	0.65
	RbcS	0.49
Pyr->AcCOA	PdhB	-0.66
	OdhB	-0.89
Cit->IsoCit	AcnB	-0.44
	SdhB_sll1625	0.66
Mal->OAA	CitH	-0.79
PEP->OAA	Ppc	0.99
Mal->Pyr	Me	0.96
